# Supplementary material
Source: PubMed Central journal article supplement (PMC2361693)
Supplement: blood_blood-2007-09-112987_1.pdf [file blood_blood-2007-09-112987_1.pdf]

|                                   | <b>Pilot Trial<br/>n=20</b> | <b>Phase II trial<br/>n=41</b> | <b>p-value for<br/>difference<br/>between two<br/>study groups</b> |
|-----------------------------------|-----------------------------|--------------------------------|--------------------------------------------------------------------|
| Median age (range)                | 45y (8-63y)                 | 45y (7-65y)                    | 0.99                                                               |
| Myeloablative conditioning        | 80%                         | 51%                            | 0.11                                                               |
| Unrelated donor                   | 30%                         | 32%                            | 0.47                                                               |
| Mismatched                        | 5%                          | 17%                            | 0.19                                                               |
| <b>GVHD at start of treatment</b> |                             |                                |                                                                    |
| Grade 2                           | 70%                         | 66%                            | 0.75                                                               |
| Grade 3-4                         | 30%                         | 34%                            |                                                                    |
| Skin                              | 70%                         | 56%                            | 0.30                                                               |
| Liver                             | 20%                         | 12%                            | 0.42                                                               |
| GI                                | 55%                         | 63%                            | 0.42                                                               |
