# Supplementary material
Source: PubMed Central journal article supplement (PMC2361693)
Supplement: blood_blood-2007-09-112987_2.pdf [file blood_blood-2007-09-112987_2.pdf]

|                        | <b>Pilot Trial<br/>n=20</b> | <b>Phase II trial<br/>n=41</b> | <b>p-value for<br/>difference between<br/>two study groups</b> |
|------------------------|-----------------------------|--------------------------------|----------------------------------------------------------------|
| <b>Overall</b>         | 15/20 (75%)                 | 27/41 (66%)                    | 0.34                                                           |
| <b>Skin</b>            | 10/14 (71%)                 | 19/23 (83%)                    | 0.10                                                           |
| <b>Liver</b>           | 1/4 (25%)                   | 5/5 (100%)                     | 0.06                                                           |
| <b>GI</b>              | 8/11 (73%)                  | 18/26 (69%)                    | 0.84                                                           |
| <b>Grade II</b>        | 13/14 (93%)                 | 19/27 (67%)                    | 0.10                                                           |
| <b>Grade III-IV</b>    | 2/6 (33%)                   | 8/14 (57%)                     | 0.34                                                           |
| <b>Related Donor</b>   | 12/14 (86%)                 | 20/28 (71%)                    | 0.31                                                           |
| <b>Unrelated Donor</b> | 3/6 (50%)                   | 7/13 (54%)                     | 0.88                                                           |
