# Supplementary material
Source: PubMed Central journal article supplement (PMC2361693)
Supplement: blood_blood-2007-09-112987_3.pdf [file blood_blood-2007-09-112987_3.pdf]

|                                 | <b>Myeloablative</b> | <b>Reduced Intensity</b> | <b>p value</b> |
|---------------------------------|----------------------|--------------------------|----------------|
| <b>Steroids alone</b>           | 19/67 (28%)          | 14/32 (44%)              | 0.09           |
| <b>Etanercept plus steroids</b> | 25/37 (68%)          | 17/24 (71%)              | 0.79           |
